# Supplementary material
Source: publisher figshare collection journal article supplement (https://asha.figshare.com/articles/dataset/_/19379738)
Supplement: Supplementary file 1 [file 1]

## Supplemental Material S2. Partner session fidelity rating form.

| Rating Parameter                                                                                                                                                             | Target to Maintain Fidelity to Protocol |
|------------------------------------------------------------------------------------------------------------------------------------------------------------------------------|-----------------------------------------|
| 1. Number of phonemic cues provided by partner                                                                                                                               | 0                                       |
| 2. Number of semantic cues provided by partner                                                                                                                               | 0                                       |
| 3. Number of suggestions for alternative strategies by partner                                                                                                               | 0                                       |
| 4. Number of correct production sequences started by partner (i.e., request for correct word production)                                                                     | 0                                       |
| 5. Number of test questions by partner (asking questions which the partner already knows the answer to)                                                                      | 0                                       |
| 6. Number of times the partner requests verbal production of effective nonverbal communication                                                                               | 0                                       |
| 7. Does a question/answer routine occur for 5 consecutive cycles without any comments or elaboration from either partner (i.e., is the interaction becoming interview-like?) | NO                                      |
| 8. Does the partner share at least 2 personal vignettes, stories, comments; may be as short as 1 utterance each; e.g., “Oh, I love going to the movies too,” etc.            | YES                                     |
| 9. Does the partner make use of back-channeling devices (mhm, head nods, yeah, etc.) at least 10 times?                                                                      | YES                                     |

*Note.* Any item not meeting the target response is scored (-); e.g., if partner provides even one phonemic cue, #1 is scored (-), and percent session fidelity is 8/9, 89%.
