# Supplementary material
Source: publisher figshare collection journal article supplement (https://asha.figshare.com/articles/dataset/_/19379738)
Supplement: Supplementary file 2 [file 1]

### **Supplemental Material S1.** Collecting conversations post-training quiz for speech-language pathologist partners.

---

1. If you don’t understand what the person with aphasia is trying to tell you, how many times should you have the person keep trying before you provide help? \_\_ **answer: “3x”** \_\_
  2. (Circle One) You **(should)** OR **should not** share brief comments or stories about yourself.
  3. It is okay for the conversation to shift naturally and take unexpected turns **(T)** / F
  4. You should be sure that the person with aphasia produces each word correctly: T **(F)**
  5. If you think you understand what the person with aphasia is trying to say, it’s ok to guess **(T)** / F
  6. You should ask a lot of yes/no or closed-ended questions, so that the person with aphasia can respond with as minimum effort as possible: T **(F)**
  7. You should ignore the person with aphasia’s use of alternative means of communication, such as writing, drawing and gesturing: T **(F)**
-
